# Supplementary material for: Noise Source and Individual Physiology Mediate Effectiveness of Bird Songs Adjusted to Anthropogenic Noise
Source: PubMed Central journal article supplement (PMC5834586; doi:10.1038/s41598-018-22253-5), 2018-03-02
Supplement: 41598_2018_22253_MOESM3_ESM.pdf [file 41598_2018_22253_MOESM3_ESM.pdf]

```

#libraries
library(car)
library(checkpoint)
library(aods3)
library(dplyr)
library(ggplot2)
library(grid)
library(gridExtra)
library(lme4)
library(lmerTest)

#This file contains code for all tables and all figures except Fig. 3.

checkpoint("2017-06-07") #reproducibility

#Import data
#save excel file as .csv in working directory, then run code.
summary.SAVS.all.times.cort <- read.csv("20170719_summary_SAVS_playbacks.csv")
summary.SAVS.all.times.cort$Band.number <- as.factor(summary.SAVS.all.times.cort$Band.number)
levels(summary.SAVS.all.times.cort$Treatment) <- c("Unadjusted",
                                                    "Adjusted")

#Time between playbacks in hours
summary(summary.SAVS.all.times.cort$playback_intervals)
sd(summary.SAVS.all.times.cort$playback_intervals, na.rm=TRUE)

#Time between capture and playback in days
summary(summary.SAVS.all.times.cort$cap_playback_intervals)
sd(summary.SAVS.all.times.cort$cap_playback_intervals)

#birds under 20m
summary.SAVS.under.20m.cort<-filter(summary.SAVS.all.times.cort,
                                   minApproach<999)

#distance to infrastructure mean and sd
(distance<- dplyr::select(summary.SAVS.under.20m.cort,
                          Band.number,
                          InfrastructureType,
                          DistanceToInfrastructureKm,
                          diff.s.c) %>%
  filter(!is.na(diff.s.c),
         InfrastructureType !="CONTROL") %>%
  distinct(Band.number,
           InfrastructureType,
           .keep_all=TRUE))

t.test(DistanceToInfrastructureKm ~ InfrastructureType,
       data = distance)

distance.summary <- group_by(distance, InfrastructureType) %>%
  summarise(meandist=mean(DistanceToInfrastructureKm),
            sddist = sd(DistanceToInfrastructureKm))

#sample size by treatment
(sample.size<- dplyr::select(summary.SAVS.under.20m.cort,
                              Band.number,
                              InfrastructureType,
                              Treatment,
                              diff.s.c) %>%
  filter(!is.na(diff.s.c)) %>%
  distinct(Band.number,
           InfrastructureType,
           Treatment,
           .keep_all=TRUE) %>%
  group_by(InfrastructureType,
           Treatment) %>%
  summarise(samplesize=n()))

#sample size by infrastructure only
(sample.size.i<- dplyr::select(summary.SAVS.under.20m.cort,
                              Band.number,
                              InfrastructureType,
                              diff.s.c) %>%
  filter(!is.na(diff.s.c)) %>%
  distinct(Band.number,
           InfrastructureType,
           .keep_all=TRUE) %>%
  group_by(InfrastructureType) %>%
  summarise(samplesize=n()))

###Correlation of variables
cor(summary.SAVS.under.20m.cort[,c("totalSongs",
                                  "totalCalls",
                                  "totalAttack",
                                  "totalWingFlicks",
                                  "minApproach",
                                  "IntimeminApproach")])

###MODELS
#Tests for changes in signal CONTENT
#difference in response to control songs vs. noise songs in quiet environments (i.e. control sites only).
controlsites<-summary.SAVS.under.20m.cort[summary.SAVS.under.20m.cort$InfrastructureType=="CONTROL",]

totalSongs.content.glmer<-glmer(totalSongs~Treatment*diff.s.c+
                                (1|Band.number),
                                data=controlsites,
                                family=poisson)

gof(totalSongs.content.glmer)
summary(totalSongs.content.glmer)

totalCalls.content.glmer<-glmer(totalCalls~Treatment*diff.s.c+
                                (1|Band.number),
                                data=controlsites,
                                family=poisson)

gof(totalCalls.content.glmer)

```

```

summary(totalCalls.content.glmer)

totalAttack.content.glmer<-glmer(totalAttack~Treatment*diff.s.c+
                                (1|Band.number),
                                data=controlsites,
                                family=poisson)

gof(totalAttack.content.glmer)
summary(totalAttack.content.glmer)

totalWingFlicks.content.glmer<-glmer(totalWingFlicks~Treatment*diff.s.c+
                                    (1|Band.number),
                                    data=controlsites,
                                    family=poisson)

gof(totalWingFlicks.content.glmer)
summary(totalWingFlicks.content.glmer)

minApproach.content.lmer<-lmer(minApproach~Treatment*diff.s.c+
                              (1|Band.number),
                              data=controlsites)

plot(minApproach.content.lmer)
summary(minApproach.content.lmer)

lntimeminApproach.content.lmer<-lmer(lntimeminApproach~Treatment*diff.s.c+
                                    (1|Band.number),
                                    data=controlsites)

plot(lntimeminApproach.content.lmer)
summary(lntimeminApproach.content.lmer)

#Tests for changes in signal TRANSMISSION
#difference in slope between site types and treatment
#CORT as co-variate/interaction
#bird as random effect

#Set up a priori contrast
#we compare both ppj and psp to control, so default contrasts work here.

#where models did not convert on default settings, used bobyqa optimizer and increased nAGQ to get convergence
#per help file settings for glmer and glmerControl.

totalSongs.glmer<-glmer(totalSongs~Treatment*InfrastructureType*diff.s.c+
                        (1|Band.number),
                        data=summary.SAVS.under.20m.cort,
                        family=poisson,
                        nAGQ=9,
                        control=glmerControl(optimizer="bobyqa"))

gof(totalSongs.glmer)
summary(totalSongs.glmer)

totalCalls.glmer.b<-glmer(totalCalls~Treatment*InfrastructureType*diff.s.c+
                          (1|Band.number),
                          data=summary.SAVS.under.20m.cort,
                          family=poisson,
                          nAGQ=9,
                          control=glmerControl(optimizer="bobyqa"))

gof(totalCalls.glmer.b)
summary(totalCalls.glmer.b)

totalAttack.glmer<-glmer(totalAttack~Treatment*InfrastructureType*diff.s.c+
                          (1|Band.number),
                          data=summary.SAVS.under.20m.cort,
                          family=poisson,
                          nAGQ=9,
                          control=glmerControl(optimizer="bobyqa"))

gof(totalAttack.glmer)
summary(totalAttack.glmer)

totalWingFlicks.glmer<-glmer(totalWingFlicks~Treatment*InfrastructureType*diff.s.c+
                              (1|Band.number),
                              data=summary.SAVS.under.20m.cort,
                              family=poisson,
                              nAGQ=9,
                              control=glmerControl(optimizer="bobyqa"))

gof(totalWingFlicks.glmer)
summary(totalWingFlicks.glmer)

minApproach.lmer<-lmer(minApproach~Treatment*InfrastructureType*diff.s.c+
                       (1|Band.number),
                       data=summary.SAVS.under.20m.cort)

plot(minApproach.lmer)
summary(minApproach.lmer)

lntimeminApproach.lmer<-lmer(lntimeminApproach~Treatment*InfrastructureType*diff.s.c+
                              (1|Band.number),
                              data=summary.SAVS.under.20m.cort)

plot(lntimeminApproach.lmer)
summary(lntimeminApproach.lmer)

#SUMMARIZING RESPONSES IN TWO TABLES
#This function gets out a row for each model.
model.summary.function <- function(fm) {
  ## check that fm is an object of the "mer" class

```



```

      sep=""),
  "Infrastructure type (SCREWPUMP vs Control) x Cort"=paste(round(models$`InfrastructureTypeSCREWPUMP:diff.s.c Estimate`, digits=2),
      "±",
      round(models$`InfrastructureTypeSCREWPUMP:diff.s.c Std. Error`,
digits=2),
      " (",
      round(models$`InfrastructureTypeSCREWPUMP:diff.s.c Pr(>|z|)`, digits=3),
      ")",
      sep=""),
  "Treatment (Adjusted vs Unadjusted) x Infrastructure type (PUMPJACK vs Control) x
Cort"=paste(round(models$`TreatmentAdjusted:InfrastructureTypePUMPJACK:diff.s.c Estimate`, digits=2),
      "±",
      round(models$`TreatmentAdjusted:InfrastructureTypePUMPJACK:diff.s.c
Std. Error`, digits=2),
      " (",
      round(models$`TreatmentAdjusted:InfrastructureTypePUMPJACK:diff.s.c
Pr(>|z|)`, digits=3),
      ")",
      sep=""),
  "Treatment (Adjusted vs Unadjusted) x Infrastructure type (SCREWPUMP vs Control) x
Cort"=paste(round(models$`TreatmentAdjusted:InfrastructureTypeSCREWPUMP:diff.s.c Estimate`, digits=2),
      "±",
      round(models$`TreatmentAdjusted:InfrastructureTypeSCREWPUMP:diff.s.c Std. Error`, digits=2),
      " (",
      round(models$`TreatmentAdjusted:InfrastructureTypeSCREWPUMP:diff.s.c Pr(>|z|)`, digits=3),
      ")",
      sep="")
)

t.table.glmer<-data.frame(t(table.glmer))
colnames(t.table.glmer)<-c("Songs",
      "Calls",
      "Attacks",
      "Wing Flicks")

lmermodels<-rbind(
  model.summary.function(minApproach.lmer),
  model.summary.function(lntimeminApproach.lmer))

table.lmer<-data.frame(
  "Nobs"=lmermodels$`Num obs`,
  "Nindividuals"=lmermodels$`NumIndividuals`,
  "Intercept"=paste(round(lmermodels$`Intercept` Estimate`, digits=2),
      "±",
      round(lmermodels$`Intercept` Std. Error`, digits=2),
      " (",
      round(lmermodels$`Intercept` Pr(>|t|)`, digits=3),
      ")",
      sep=""),
  "Treatment (Adjusted vs. Unadjusted)"=paste(round(lmermodels$`TreatmentAdjusted Estimate`, digits=2),
      "±",
      round(lmermodels$`TreatmentAdjusted Std. Error`, digits=2),
      " (",
      round(lmermodels$`TreatmentAdjusted Pr(>|t|)`, digits=3),
      ")",
      sep=""),
  "Infrastructure type (PUMPJACK vs Control)"=paste(round(lmermodels$`InfrastructureTypePUMPJACK Estimate`, digits=2),
      "±",
      round(lmermodels$`InfrastructureTypePUMPJACK Std. Error`, digits=2),
      " (",
      round(lmermodels$`InfrastructureTypePUMPJACK Pr(>|t|)`, digits=3),
      ")",
      sep=""),
  "Infrastructure type (SCREWPUMP vs Control)"=paste(round(lmermodels$`InfrastructureTypeSCREWPUMP Estimate`, digits=2),
      "±",
      round(lmermodels$`InfrastructureTypeSCREWPUMP Std. Error`, digits=2),
      " (",
      round(lmermodels$`InfrastructureTypeSCREWPUMP Pr(>|t|)`, digits=3),
      ")",
      sep=""),
  "Cort"=paste(round(lmermodels$`diff.s.c Estimate`, digits=2),
      "±",
      round(lmermodels$`diff.s.c Std. Error`, digits=2),
      " (",
      round(lmermodels$`diff.s.c Pr(>|t|)`, digits=3),
      ")",
      sep=""),
  "Treatment x Infrastructure type (Adjusted vs. Unadjusted and PUMPJACK vs
Control)"=paste(round(lmermodels$`TreatmentAdjusted:InfrastructureTypePUMPJACK Estimate`, digits=2),
      "±",
      round(lmermodels$`TreatmentAdjusted:InfrastructureTypePUMPJACK
Std. Error`, digits=2),
      " (",
      round(lmermodels$`TreatmentAdjusted:InfrastructureTypePUMPJACK
Pr(>|t|)`, digits=3),
      ")",
      sep=""),
  "Treatment x Infrastructure type (Adjusted vs. Unadjusted and SCREWPUMP vs
Control)"=paste(round(lmermodels$`TreatmentAdjusted:InfrastructureTypeSCREWPUMP Estimate`, digits=2),
      "±",
      round(lmermodels$`TreatmentAdjusted:InfrastructureTypeSCREWPUMP
Std. Error`, digits=2),
      " (",
      round(lmermodels$`TreatmentAdjusted:InfrastructureTypeSCREWPUMP
Pr(>|t|)`, digits=3),
      ")",
      sep=""),
  "Treatment x Cort"=paste(round(lmermodels$`TreatmentAdjusted:diff.s.c Estimate`, digits=2),
      "±",
      round(lmermodels$`TreatmentAdjusted:diff.s.c Std. Error`, digits=2),
      " (",

```

```

        round(lmermodels$`TreatmentAdjusted:diff.s.c Pr(>|t|)` , digits=3),
        ")",
        sep=""),
  "Infrastructure type (PUMPJACK vs Control) x Cort"=paste(round(lmermodels$`InfrastructureTypePUMPJACK:diff.s.c Estimate` , digits=2),
        "±",
        round(lmermodels$`InfrastructureTypePUMPJACK:diff.s.c Std. Error` , digits=2),
        " (",
        round(lmermodels$`InfrastructureTypePUMPJACK:diff.s.c Pr(>|t|)` , digits=3),
        ")",
        sep=""),
  "Infrastructure type (SCREWPUMP vs Control) x Cort"=paste(round(lmermodels$`InfrastructureTypeSCREWPUMP:diff.s.c Estimate` , digits=2),
        "±",
        round(lmermodels$`InfrastructureTypeSCREWPUMP:diff.s.c Std. Error` , digits=2),
        " (",
        round(lmermodels$`InfrastructureTypeSCREWPUMP:diff.s.c Pr(>|t|)` , digits=3),
        ")",
        sep=""),
  "Treatment (Adjusted vs Unadjusted) x Infrastructure type (PUMPJACK vs Control) x
Cort"=paste(round(lmermodels$`TreatmentAdjusted:InfrastructureTypePUMPJACK:diff.s.c Estimate` , digits=2),
        "±",
        round(lmermodels$`TreatmentAdjusted:InfrastructureTypePUMPJACK:diff.s.c Std. Error` , digits=2),
        " (",
        round(lmermodels$`TreatmentAdjusted:InfrastructureTypePUMPJACK:diff.s.c Pr(>|t|)` , digits=3),
        ")",
        sep=""),
  "Treatment (Adjusted vs Unadjusted) x Infrastructure type (SCREWPUMP vs Control) x
Cort"=paste(round(lmermodels$`TreatmentAdjusted:InfrastructureTypeSCREWPUMP:diff.s.c Estimate` , digits=2),
        "±",
        round(lmermodels$`TreatmentAdjusted:InfrastructureTypeSCREWPUMP:diff.s.c Std. Error` , digits=2),
        " (",
        round(lmermodels$`TreatmentAdjusted:InfrastructureTypeSCREWPUMP:diff.s.c Pr(>|t|)` , digits=3),
        ")",
        sep="")
)

t.table.lmer<-data.frame(t(table.lmer))
colnames(t.table.lmer)<-c("min Approach",
        "ln Time to Min Approach")

signal.results<-cbind(t.table.glmer,
        t.table.lmer)

#Table 1
write.csv(signal.results,
        file="signal_models.csv",
        fileEncoding="Windows-1252")

##CONTENT model summary (Extended Data Table 1)
models.content<-rbind(
  model.summary.function(totalSongs.content.glmer),
  model.summary.function(totalCalls.content.glmer),
  model.summary.function(totalAttack.content.glmer),
  model.summary.function(totalWingFlicks.content.glmer)
)

table.glmer.content<-data.frame(
  "Nobs"=models.content$`Num obs`,
  "Nindividuals"=models.content$`NumIndividuals`,
  "Intercept"=paste(round(models.content$` (Intercept) Estimate` , digits=2),
        "±",
        round(models.content$` (Intercept) Std. Error` , digits=2),
        " (",
        round(models.content$` (Intercept) Pr(>|z|)` , digits=3),
        ")",
        sep=""),
  "Treatment (Adjusted vs. Unadjusted)"=paste(round(models.content$`TreatmentAdjusted Estimate` , digits=2),
        "±",
        round(models.content$`TreatmentAdjusted Std. Error` , digits=2),
        " (",
        round(models.content$`TreatmentAdjusted Pr(>|z|)` , digits=3),
        ")",
        sep=""),
  "Cort"=paste(round(models.content$`diff.s.c Estimate` , digits=2),
        "±",
        round(models.content$`diff.s.c Std. Error` , digits=2),
        " (",
        round(models.content$`diff.s.c Pr(>|z|)` , digits=3),
        ")",
        sep=""),
  "Treatment x Cort"=paste(round(models.content$`TreatmentAdjusted:diff.s.c Estimate` , digits=2),
        "±",
        round(models.content$`TreatmentAdjusted:diff.s.c Std. Error` , digits=2),
        " (",
        round(models.content$`TreatmentAdjusted:diff.s.c Pr(>|z|)` , digits=3),
        ")",
        sep="")
)

t.table.glmer.content<-data.frame(t(table.glmer.content))
colnames(t.table.glmer.content)<-c("Songs",
        "Calls",
        "Attacks",
        "Wing Flicks")

lmermodels.content<-rbind(
  model.summary.function(minApproach.content.lmer),

```

```

model.summary.function(lmtimeinApproach.content.lmer))

table.lmer.content<-data.frame(
  "Nobs"=lmermodels.content$`Num obs`,
  "Nindividuals"=lmermodels.content$`NumIndividuals`,
  "Intercept"=paste(round(lmermodels.content$`(Intercept) Estimate`, digits=2),
    "±",
    round(lmermodels.content$`(Intercept) Std. Error`, digits=2),
    " (",
    round(lmermodels.content$`(Intercept) Pr(>|t|)`, digits=3),
    ")",
    sep=""),
  "Treatment (Adjusted vs. Unadjusted)"=paste(round(lmermodels.content$`TreatmentAdjusted Estimate`, digits=2),
    "±",
    round(lmermodels.content$`TreatmentAdjusted Std. Error`, digits=2),
    " (",
    round(lmermodels.content$`TreatmentAdjusted Pr(>|t|)`, digits=3),
    ")",
    sep=""),
  "Cort"=paste(round(lmermodels.content$`diff.s.c Estimate`, digits=2),
    "±",
    round(lmermodels.content$`diff.s.c Std. Error`, digits=2),
    " (",
    round(lmermodels.content$`diff.s.c Pr(>|t|)`, digits=3),
    ")",
    sep=""),
  "Treatment x Cort"=paste(round(lmermodels.content$`TreatmentAdjusted:diff.s.c Estimate`, digits=2),
    "±",
    round(lmermodels.content$`TreatmentAdjusted:diff.s.c Std. Error`, digits=2),
    " (",
    round(lmermodels.content$`TreatmentAdjusted:diff.s.c Pr(>|t|)`, digits=3),
    ")",
    sep="")
)

t.table.lmer.content<-data.frame(t(table.lmer.content))
colnames(t.table.lmer.content)<-c("min Approach",
  "ln Time to Min Approach")

content.results<-cbind(t.table.glmer.content,
  t.table.lmer.content)

#Extended Data Table 1.
write.csv(content.results,
  file="content_models.csv",
  fileEncoding="Windows-1252") #required to get plus or minus symbols to work right

####FIGURES
#####

#Function to get prediction lines for figure.
prediction.function<-function(behaviormerModobject,
  infrastructuretype,
  treatment){
  nd<-data.frame("diff.s.c"=seq(min(summary.SAVS.under.20m.cort$diff.s.c[summary.SAVS.under.20m.cort$InfrastructureType==infrastructuretype&
    summary.SAVS.under.20m.cort$Treatment==treatment],
    na.rm=TRUE),
  max(summary.SAVS.under.20m.cort$diff.s.c[summary.SAVS.under.20m.cort$InfrastructureType==infrastructuretype&
    summary.SAVS.under.20m.cort$Treatment==treatment],
    na.rm=TRUE),
    length.out=length(summary.SAVS.under.20m.cort$diff.s.c)),
  "InfrastructureType"=infrastructuretype,
  "Treatment"=treatment)
  predicted<-data.frame("y"=predict(behaviormerModobject,
    newdata=nd,
    type="response",
    re.form=NA),#do not condition on random effects
    nd)
}

#Prediction lines for Figure 2.
#TotalSongs
predict.ccontrol.totalSongs<-prediction.function(totalSongs.glmer,
  "CONTROL",
  "Unadjusted")
predict.ppjcontrol.totalSongs<-prediction.function(totalSongs.glmer,
  "PUMPJACK",
  "Unadjusted")
predict.pspcontrol.totalSongs<-prediction.function(totalSongs.glmer,
  "SCREWPUMP",
  "Unadjusted")
predict.cnoise.totalSongs<-prediction.function(totalSongs.glmer,
  "CONTROL",
  "Adjusted")
predict.ppjnoise.totalSongs<-prediction.function(totalSongs.glmer,
  "PUMPJACK",
  "Adjusted")
predict.pspnoise.totalSongs<-prediction.function(totalSongs.glmer,
  "SCREWPUMP",
  "Adjusted")

predicts.Songs<-bind_rows(predict.ccontrol.totalSongs,
  predict.ppjcontrol.totalSongs,
  predict.pspcontrol.totalSongs,
  predict.cnoise.totalSongs,
  predict.ppjnoise.totalSongs,
  predict.pspnoise.totalSongs)

```



```

        "PUMPJACK",
        "Adjusted")
predict.pspnoise.minApproach<-prediction.function(minApproach.lmer,
        "SCREWPUMP",
        "Adjusted")

predicts.minApproach<-bind_rows(predict.ccontrol.minApproach,
        predict.ppjcontrol.minApproach,
        predict.pspcontrol.minApproach,
        predict.cnoise.minApproach,
        predict.ppjnoise.minApproach,
        predict.pspnoise.minApproach)

##ln time to min approach distance
predict.ccontrol.lntimeminApproach<-prediction.function(lntimeminApproach.lmer,
        "CONTROL",
        "Unadjusted")
predict.ppjcontrol.lntimeminApproach<-prediction.function(lntimeminApproach.lmer,
        "PUMPJACK",
        "Unadjusted")
predict.pspcontrol.lntimeminApproach<-prediction.function(lntimeminApproach.lmer,
        "SCREWPUMP",
        "Unadjusted")
predict.cnoise.lntimeminApproach<-prediction.function(lntimeminApproach.lmer,
        "CONTROL",
        "Adjusted")
predict.ppjnoise.lntimeminApproach<-prediction.function(lntimeminApproach.lmer,
        "PUMPJACK",
        "Adjusted")
predict.pspnoise.lntimeminApproach<-prediction.function(lntimeminApproach.lmer,
        "SCREWPUMP",
        "Adjusted")

predicts.lntimeminApproach<-bind_rows(predict.ccontrol.lntimeminApproach,
        predict.ppjcontrol.lntimeminApproach,
        predict.pspcontrol.lntimeminApproach,
        predict.cnoise.lntimeminApproach,
        predict.ppjnoise.lntimeminApproach,
        predict.pspnoise.lntimeminApproach)

#colors and linetypes for figures.
summary.SAVS.under.20m.cort$color <- "white"
summary.SAVS.under.20m.cort[summary.SAVS.under.20m.cort$Treatment == "Unadjusted"&
        summary.SAVS.under.20m.cort$InfrastructureType == "CONTROL",
        "color"] <- "gray"
summary.SAVS.under.20m.cort$Group <- "treatments"
summary.SAVS.under.20m.cort[summary.SAVS.under.20m.cort$Treatment == "Unadjusted"&
        summary.SAVS.under.20m.cort$InfrastructureType == "CONTROL",
        "Group"] <- "reference"
col <- as.character(summary.SAVS.under.20m.cort$color)
names(col) <- as.character(summary.SAVS.under.20m.cort$Group)

#color changes from: https://stackoverflow.com/questions/35279570/assign-point-color-depending-on-data-frame-column-value-r

#Figure 2
svg(file = "Figure_2.svg",
    width = 183*0.0393701,
    height = (247/3)*4*0.0393701)
#a
predicts.Songs$lines <- "solid"
predicts.Songs[predicts.Songs$Treatment == "Unadjusted"&
        predicts.Songs$InfrastructureType == "CONTROL",
        "lines"] <- "21"
predicts.Songs$Group <- "treatments"
predicts.Songs[predicts.Songs$Treatment == "Unadjusted"&
        predicts.Songs$InfrastructureType == "CONTROL",
        "Group"] <- "reference"
lina <- as.character(predicts.Songs$lines)
names(lina) <- as.character(predicts.Songs$Group)

predicts.Songs[predicts.Songs$Treatment == "Unadjusted", "color"] <- "darkgray"
predicts.Songs[predicts.Songs$Treatment == "Adjusted", "color"] <- "black"
predicts.Songs[predicts.Songs$Treatment == "Unadjusted", "GroupColor"] <- "Unadjusted"
predicts.Songs[predicts.Songs$Treatment == "Adjusted", "GroupColor"] <- "Adjusted"
linecol <- as.character(predicts.Songs$color)
names(linecol) <- as.character(predicts.Songs$GroupColor)

plot.a <- ggplot(data = summary.SAVS.under.20m.cort,
        mapping = aes(x = diff.s.c,
                y = totalSongs,
                color=Treatment
        ))+
    facet_wrap(~InfrastructureType,
        labeller = labeller(InfrastructureType = c(CONTROL = "Control",
                PUMPJACK = "Pumpjack*",
                SCREWPUMP = "Screw pump*")))+
    theme_classic()+
    geom_line(data=predicts.Songs,
        mapping = aes (x = diff.s.c,
                y = y,
                linetype = Group
        ),
        size=1.25)+
    geom_line(mapping = aes (group=Band.number),
        color="gray")+
    geom_jitter(size=3)+
    scale_color_manual(values = linecol) +
    scale_linetype_manual(values = lina) +
    theme(legend.position="none",
        strip.text.x = element_text(size=14,
                face="bold"),
        strip.background = element_rect(colour=c("white"))),

```



```

axis.text=element_text(size=14),
axis.title=element_text(size=14))+
labs(x="Scaled and centred CORT (acute-basal)",
y="Total number of songs")

(plot.a2 <- grid.arrange(plot.a,
  top = textGrob("a",
    x = 0,
    y = 0.9,
    just = c("left", "top"),
    gp = gpar(family = "sans",
      font = 2))))

#b
predicts.calls$lines <- "solid"
predicts.calls[predicts.calls$Treatment == "Unadjusted"&
  predicts.calls$InfrastructureType == "CONTROL",
  "lines"] <- "21"
predicts.calls$Group <- "treatments"
predicts.calls[predicts.calls$Treatment == "Unadjusted"&
  predicts.calls$InfrastructureType == "CONTROL",
  "Group"] <- "reference"
linb <- as.character(predicts.calls$lines)
names(linb) <- as.character(predicts.calls$Group)

predicts.calls[predicts.calls$Treatment == "Unadjusted", "color"] <- "darkgray"
predicts.calls[predicts.calls$Treatment == "Adjusted", "color"] <- "black"
predicts.calls[predicts.calls$Treatment == "Unadjusted", "GroupColor"] <- "Unadjusted"
predicts.calls[predicts.calls$Treatment == "Adjusted", "GroupColor"] <- "Adjusted"
linecol <- as.character(predicts.calls$color)
names(linecol) <- as.character(predicts.calls$GroupColor)

plot.b <- ggplot(data = summary.SAVS.under.20m.cort,
  mapping = aes(x = diff.s.c,
    y = totalCalls,
    color=Treatment))+
  theme_classic()+
  facet_wrap(~InfrastructureType,
    labeller = labeller(InfrastructureType = c(CONTROL = "Control",
      PUMPJACK = "Pumpjack*",
      SCREWPUMP = "Screw pump*")))+
  geom_line(data=predicts.calls,
    mapping = aes(x = diff.s.c,
      y = y,
      linetype = Group),
    size=1.25)+
  geom_line(mapping = aes(group=Band.number),
    color="gray")+
  geom_jitter(size=3)+
  scale_color_manual(values = linecol) +
  scale_linetype_manual(values = linb) +
  theme(legend.position="none",
    strip.text.x = element_text(size=14,
      face="bold"),
    strip.background = element_rect(colour=c("white")),
    axis.text=element_text(size=14),
    axis.title=element_text(size=14))+
  labs(x="Scaled and centred CORT (acute-basal)",
    y="Total number of calls")
(plot.b2 <- grid.arrange(plot.b,
  top = textGrob("b",
    x = 0,
    y = 0.9,
    just = c("left", "top"),
    gp = gpar(family = "sans",
      font = 2))))

#c
summary.SAVS.under.20m.cort$color <- "white"
summary.SAVS.under.20m.cort[summary.SAVS.under.20m.cort$Treatment == "Unadjusted"&
  summary.SAVS.under.20m.cort$InfrastructureType == "CONTROL",
  "color"] <- "gray"
summary.SAVS.under.20m.cort$Group <- "treatments"
summary.SAVS.under.20m.cort[summary.SAVS.under.20m.cort$Treatment == "Unadjusted"&
  summary.SAVS.under.20m.cort$InfrastructureType == "CONTROL",
  "Group"] <- "reference"
col <- as.character(summary.SAVS.under.20m.cort$color)
names(col) <- as.character(summary.SAVS.under.20m.cort$Group)

plot.c <- ggplot(data = summary.SAVS.under.20m.cort)+
  geom_boxplot(mapping = aes(x = Treatment,
    y = totalAttack,
    fill = Group))+
  facet_wrap(~InfrastructureType,
    labeller = labeller(InfrastructureType = c(CONTROL = "Control",
      PUMPJACK = "Pumpjack*",
      SCREWPUMP = "Screw pump*")))+
  theme_classic()+
  scale_fill_manual(values = col) +
  theme(legend.position="none",
    strip.text.x = element_text(size=14,
      face="bold"),
    strip.background = element_rect(colour=c("white")),
    axis.text=element_text(size=14),
    axis.title=element_text(size=14))+
  labs(x="Song type",
    y="Total number of attacks")
(plot.c2 <- grid.arrange(plot.c,
  top = textGrob("c",
    x = 0,
    y = 0.9,
    just = c("left", "top"),
    gp = gpar(family = "sans",

```



```

    ))+
facet_grid(~InfrastructureType,
  labeller = labeller(InfrastructureType = c(CONTROL = "Control",
      PUMPJACK = "Pumpjack*",
      SCREWPUMP = "Screw pump")))+

theme_classic()+
scale_fill_manual(values = col) +
theme(legend.position="none",
  strip.text.x = element_text(face="bold"),
  strip.background = element_rect(colour="white"))+
labs(x="Song type",
  y="Minimum approach distance (m)")
dev.off()

#Supplementary Data Fig. S3
predicts.lntimeminApproach$lines <- "solid"
predicts.lntimeminApproach[predicts.lntimeminApproach$Treatment == "Unadjusted"&
  predicts.lntimeminApproach$InfrastructureType == "CONTROL",
  "lines"] <- "21"
predicts.lntimeminApproach$Group <- "treatments"
predicts.lntimeminApproach[predicts.lntimeminApproach$Treatment == "Unadjusted"&
  predicts.lntimeminApproach$InfrastructureType == "CONTROL",
  "Group"] <- "reference"
lined4 <- as.character(predicts.lntimeminApproach$lines)
names(lined4) <- as.character(predicts.lntimeminApproach$Group)

predicts.lntimeminApproach[predicts.lntimeminApproach$Treatment == "Unadjusted", "color"] <- "darkgray"
predicts.lntimeminApproach[predicts.lntimeminApproach$Treatment == "Adjusted", "color"] <- "black"
predicts.lntimeminApproach[predicts.lntimeminApproach$Treatment == "Unadjusted", "GroupColor"] <- "Unadjusted"
predicts.lntimeminApproach[predicts.lntimeminApproach$Treatment == "Adjusted", "GroupColor"] <- "Adjusted"
linecol.lntimeminApproach <- as.character(predicts.lntimeminApproach$color)
names(linecol.lntimeminApproach) <- as.character(predicts.lntimeminApproach$GroupColor)

svg(file = "Figure_S3.svg",
  width = 183*0.0393701,
  height = (247/3)*0.0393701)

(plot.ed4 <- ggplot(data = summary.SAVS.under.20m.cort,
  mapping = aes(x = diff.s.c,
    y = lntimeminApproach,
    color=Treatment))+

  facet_grid(~InfrastructureType,
    labeller = labeller(InfrastructureType = c(CONTROL = "Control",
      PUMPJACK = "Pumpjack",
      SCREWPUMP = "Screw pump*")))+

theme_classic()+

geom_line(data=predicts.lntimeminApproach,
  mapping = aes (x = diff.s.c,
    y = Y,
    linetype = Group),
  size=1.25)+
geom_line(mapping = aes (group=Band.number),
  color="gray")+

geom_jitter(size=3)+

  scale_color_manual(values = linecol.lntimeminApproach) +
  scale_linetype_manual(values = lined4) +
  theme(legend.position="none",
    strip.text.x = element_text(face="bold"),
    strip.background = element_rect(colour="white"))+
  labs(x="Scaled and centred CORT (acute-basal)",
    y="Ln time to minimum approach distance (s)")
dev.off()

```
